# Supplementary material for: Graphdiyne and Nitrogen-Doped Graphdiyne Nanotubes as Highly Efficient Electrocatalysts for Oxygen Reduction Reaction
Source: MDPI journal article supplement (doi:10.3390/ijms242316813), 2023-11-27
Supplement: s1 [file s1]

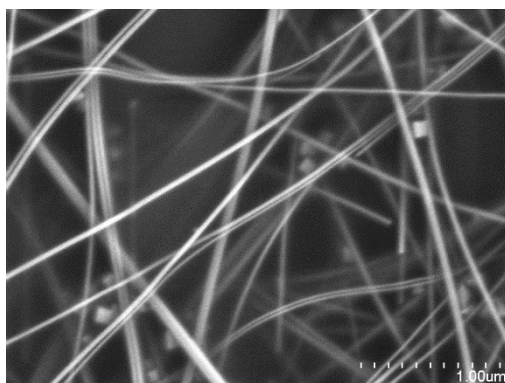

**Figure S1** SEM image of Cu nanowire.

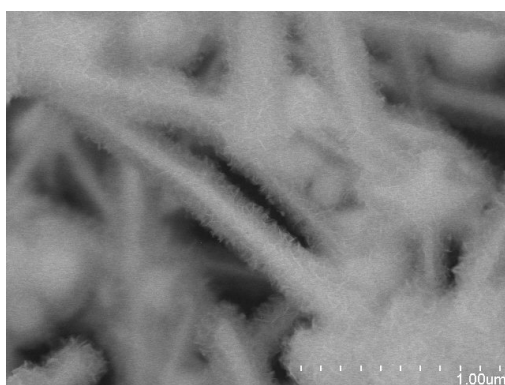

**Figure S2** SEM image of GDY@Cu.

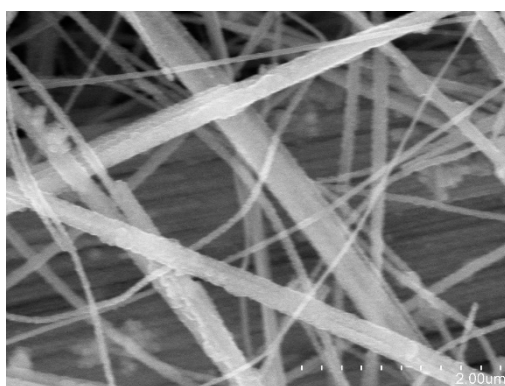

**Figure S3** SEM image of NGDY@Cu.

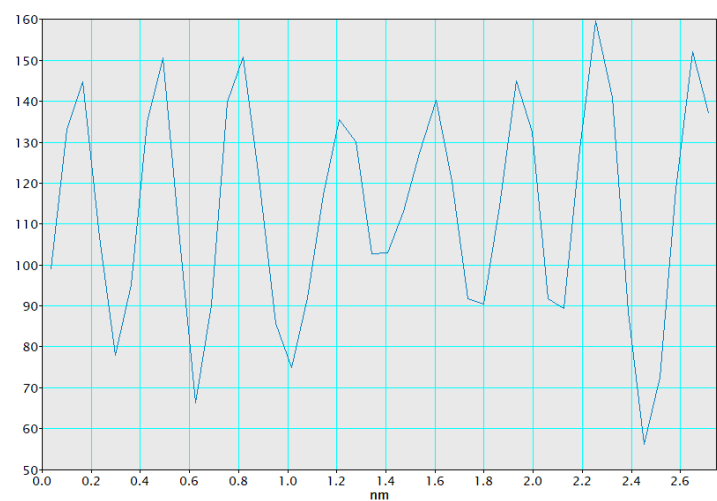

**Figure S4** The interlayer distance of GDY nanotube.

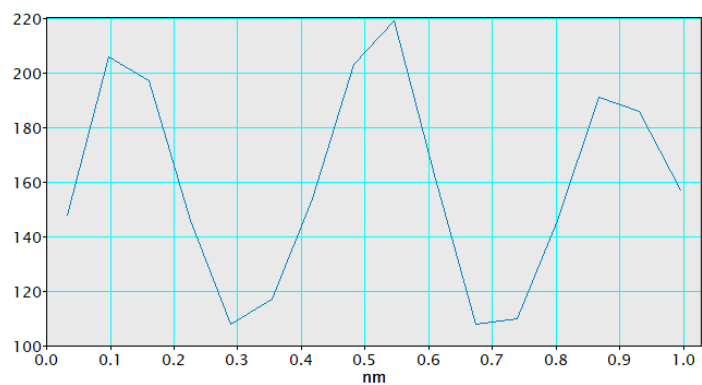

**Figure S5** The interlayer distance of NGDY nanotube.

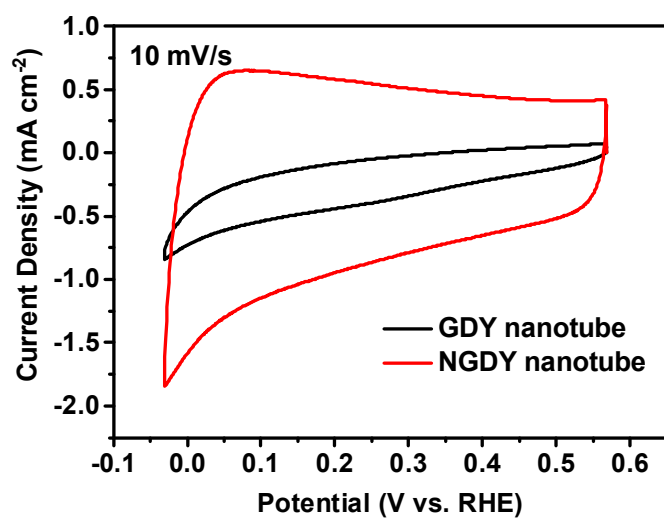

**Figure S6** CV curves of GDY nanotube and NGDY nanotube.

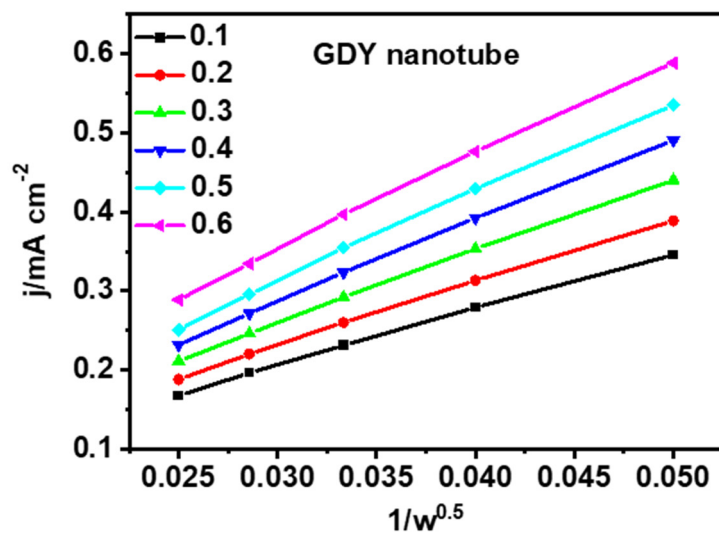

Figure S7 Koutecky-Levich plots of GDY.

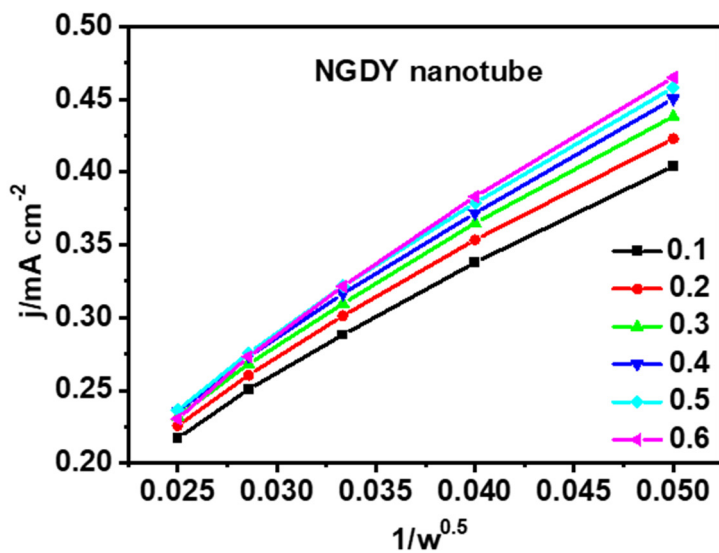

Figure S8 Koutecky-Levich plots of NGDY.

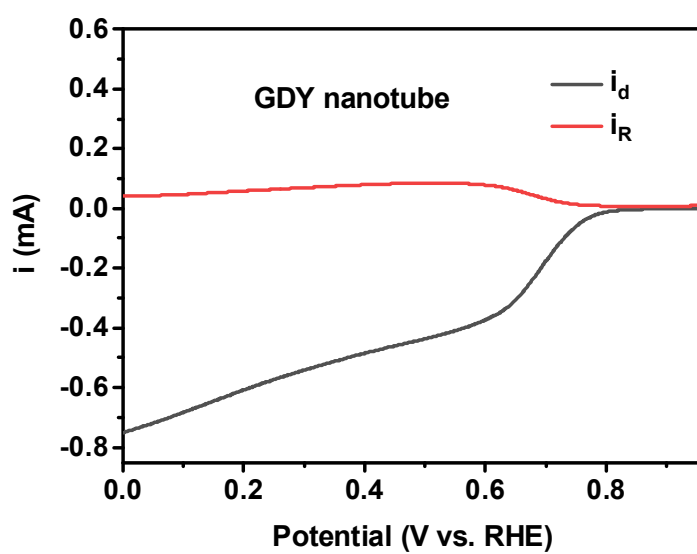

Figure S9 RRDE linear sweep voltammogram of GDY.

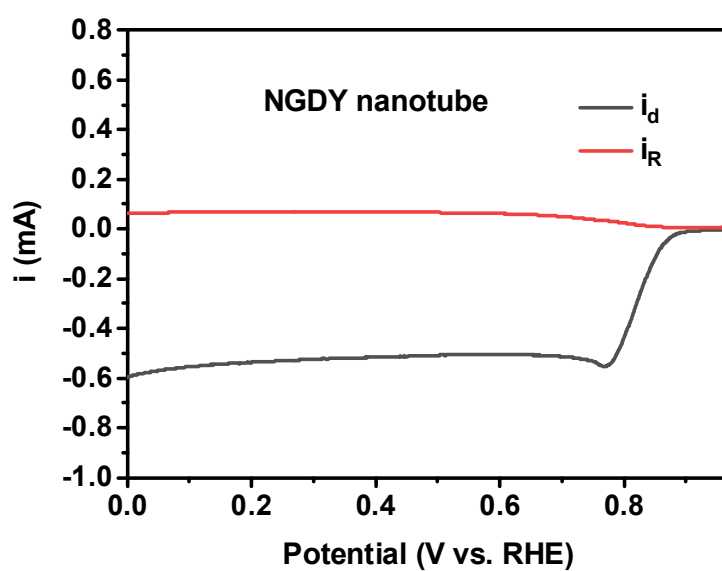

Figure S10 RRDE linear sweep voltammogram of NGDY.

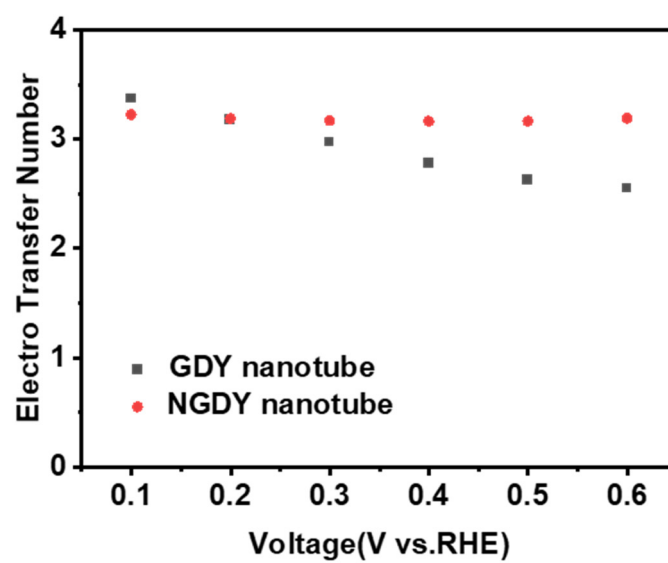

**Figure S11** Electron transfer numbers of GDY nanotube and NGDY nanotube electrodes according to RRDE.

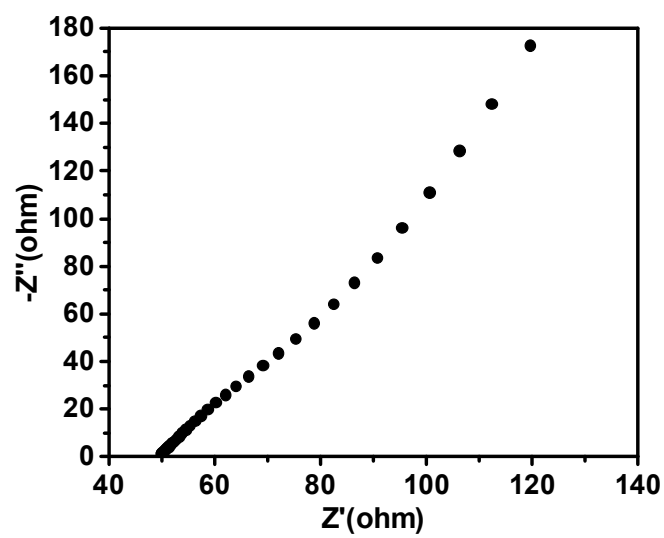

**Figure S12** Nyquist plots of solution resistance.
